# Supplementary material
Source: Springer Nature journal article supplement (https://www.springermedizin.de/resource/supplementary/12876_2010_473_MOESM4_ESM.pdf/9437086)

**A**

PBS

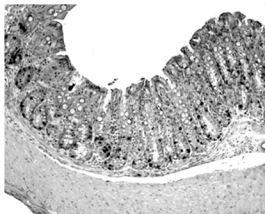PGE<sub>2</sub>  
Low dose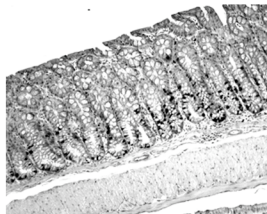PGE<sub>2</sub>  
High dose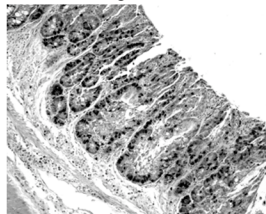**B**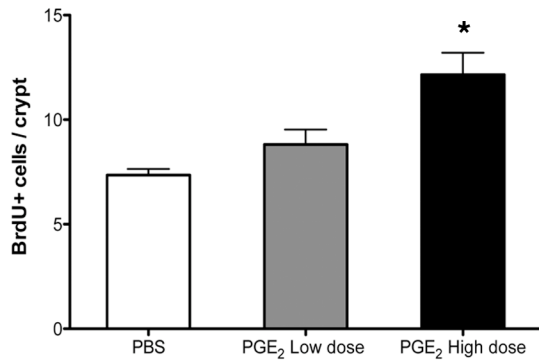**C**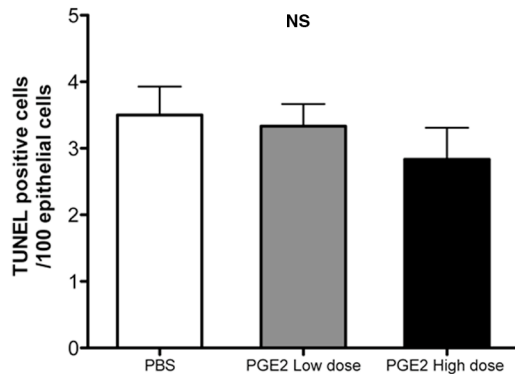

Supplement: MOESM4 [file 9437086]
